# Supplementary material
Source: ML conference proceedings conference paper supplement (https://openreview.net/forum?id=fvho95EtPu)

bending1

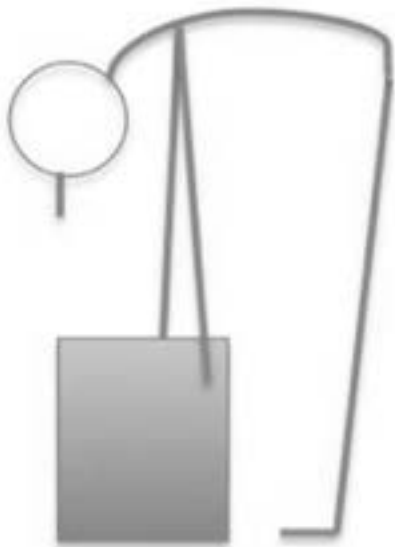

bending2

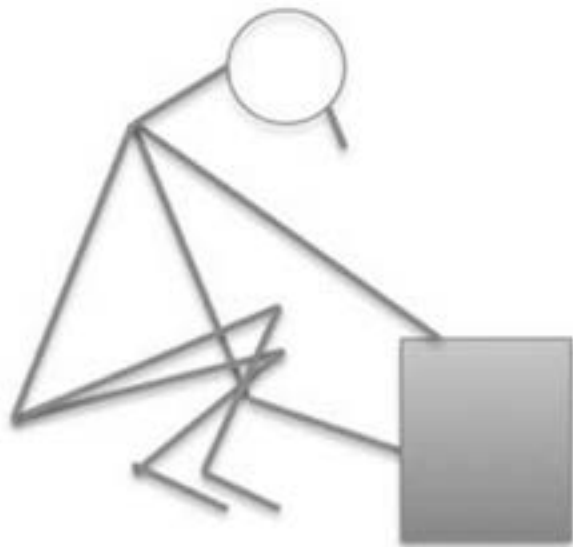

Supplement: supplementary_material [file bendingType.pdf › bendingType.pdf]

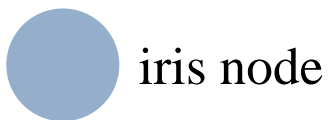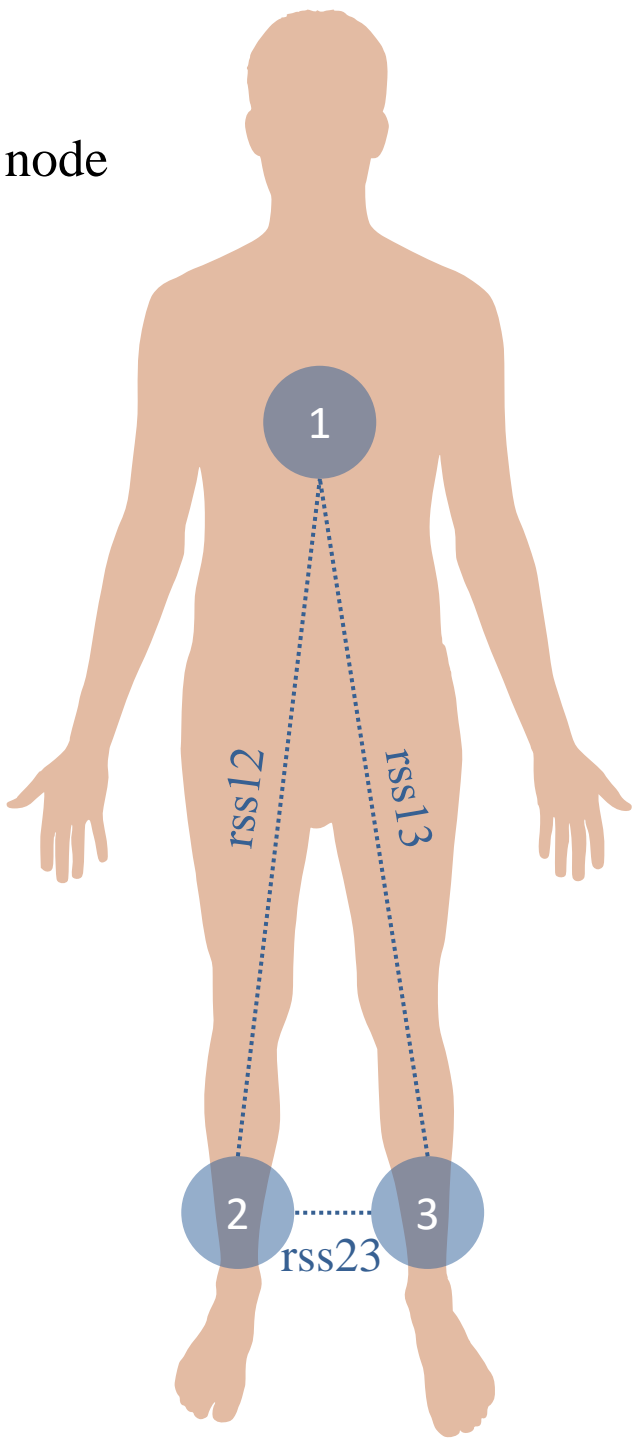

Supplement: supplementary_material [file sensorsPlacement.pdf › sensorsPlacement.pdf]
